# Supplementary material
Source: publisher figshare collection journal article supplement (https://acs.figshare.com/ndownloader/files/3851479)
Supplement: Supplementary file 1 [file 3851479]

# Supporting Information

## Enhanced Thermoelectric Performance of PEDOT:PSS Flexible Bulky Papers by Treatment with Secondary Dopants

Desalegn A. Mengistie,<sup>a,b,c</sup> Chang-Hsiao Chen,<sup>d</sup> Karunakara M. Boopathi,<sup>a,b,e</sup> Ferry W. Pranoto,<sup>d</sup> Lain-Jong Li,<sup>d</sup> and Chih-Wei Chu<sup>\*b,f</sup>

<sup>a</sup> Nanoscience and Technology Program, Taiwan International Graduate Program, Academia Sinica, Taipei 115, Taiwan

<sup>b</sup> Research Center for Applied Sciences, Academia Sinica, Taipei 115, Taiwan, Fax: 886-2-2787-3122 Tel: 886-2-2787-3183 Email: [gchu@gate.sinica.edu.tw](mailto:gchu@gate.sinica.edu.tw)

<sup>c</sup> Bahir Dar University, Bahir Dar, P.O.Box 26, Ethiopia

<sup>d</sup> Institute of Atomic and Molecular Sciences, Academia Sinica, Taipei 10617, Taiwan

<sup>e</sup> Department of Engineering and Systems Science, National Tsing Hua University, Hsinchu 30013, Taiwan

<sup>f</sup> Department of Photonics, National Chiao Tung University, Hsinchu 30010, Taiwan

\*Corresponding author. E-mail: [gchu@gate.sinica.edu.tw](mailto:gchu@gate.sinica.edu.tw) Tel: 886-2-2787-3183 Fax: 886-2-2787-3122

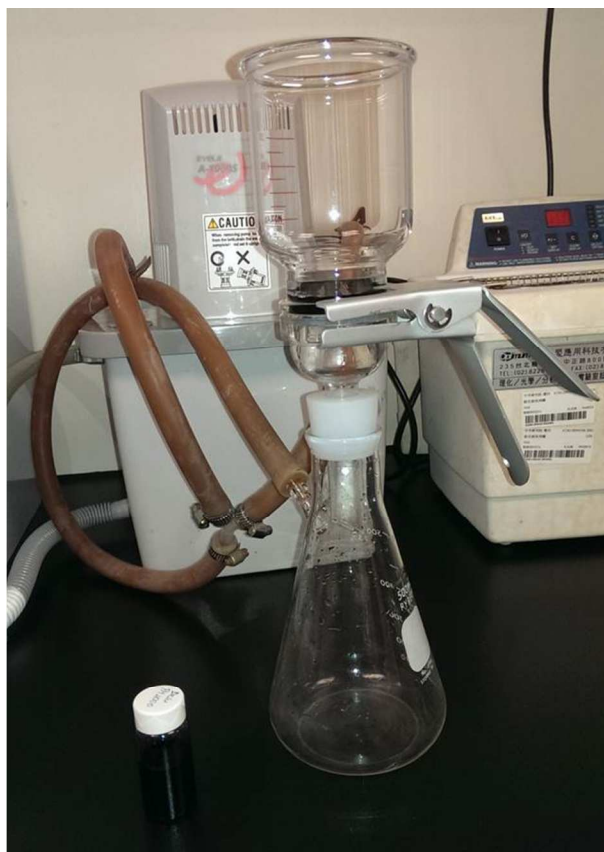

**Figure S1** Setup for the vacuum assisted filtration to prepare PEDOT:PSS bulky papers.

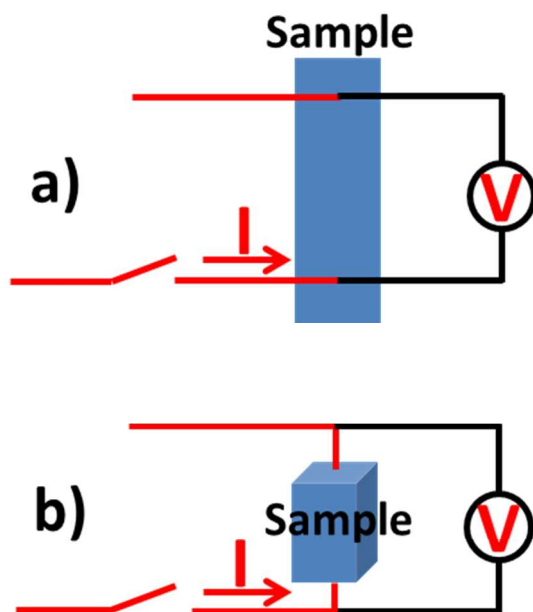

**Figure S2** Schematic diagram of ZT measurement system by Harman method: a) in-plane and b) vertical.

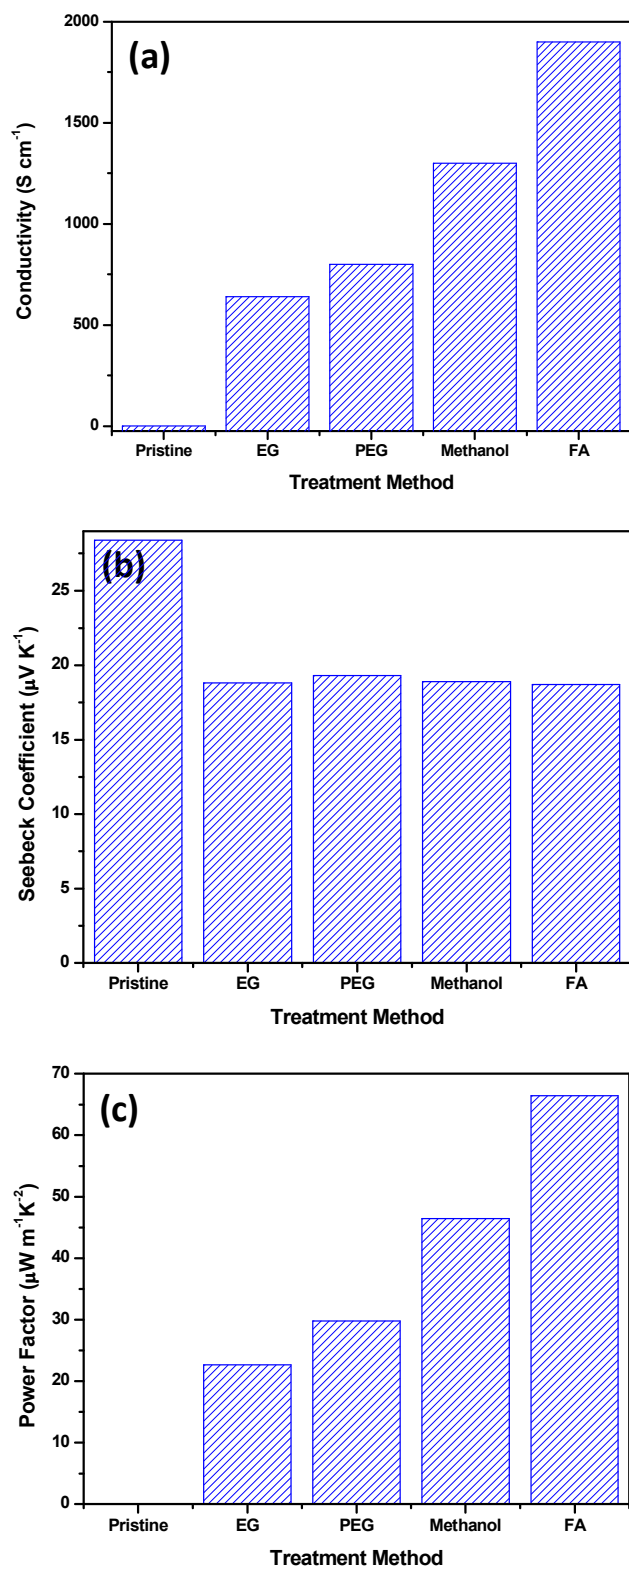

**Figure S3** Thermoelectric properties of PEDOT:PSS thin films with different treatment methods: (a) electrical conductivity, (b) Seebeck coefficient and (c) power factor.

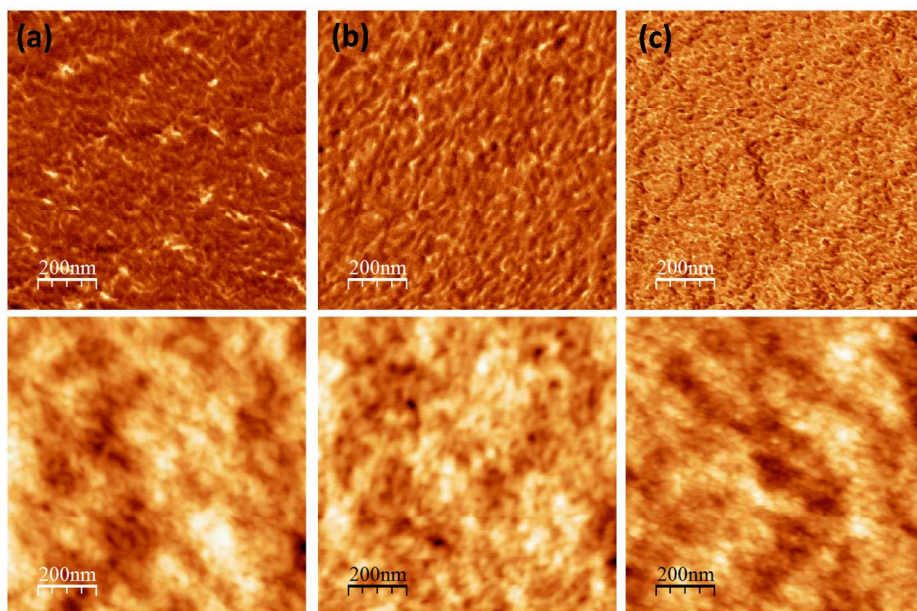

**Figure S4** AFM images of PEDOT:PSS bulky papers: (a) pristine, treated with (b) EG and (c) formic acid. The upper images are phase images and the lower topographic. All images are  $1\mu\text{m} \times 1\mu\text{m}$ .

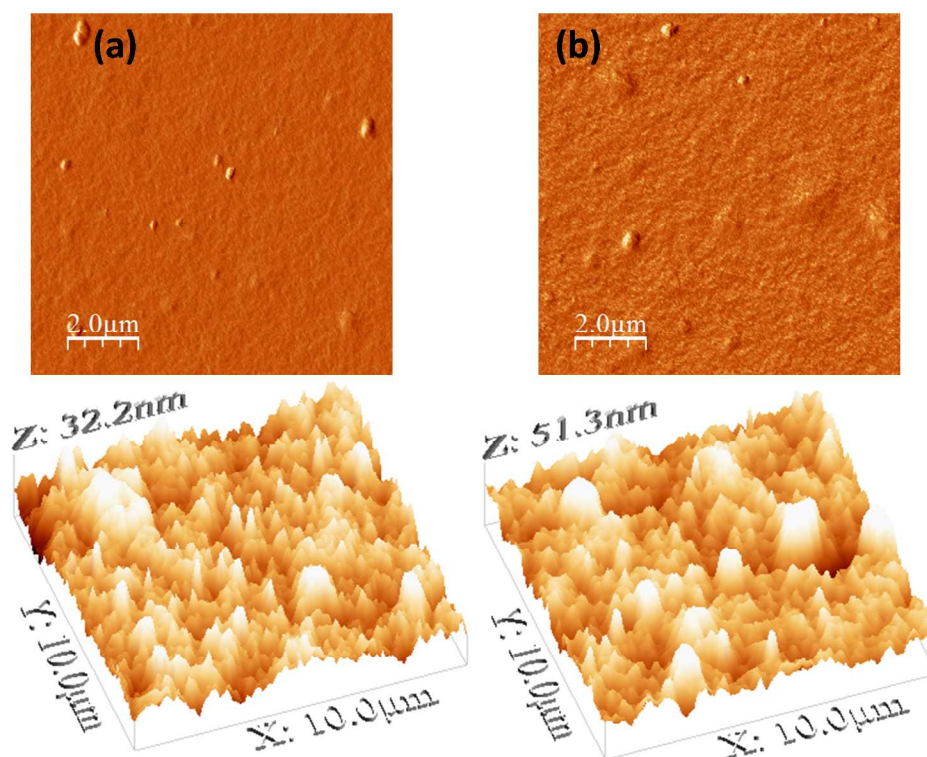

**Figure S5** AFM images of PEDOT:PSS bulky papers: (a) pristine and (b) treated with EG. The upper images are phase images and the lower topographic. All images are  $10\mu\text{m} \times 10\mu\text{m}$ . The rms roughness is 6.4 nm for pristine and 9.98 nm for EG treated papers.

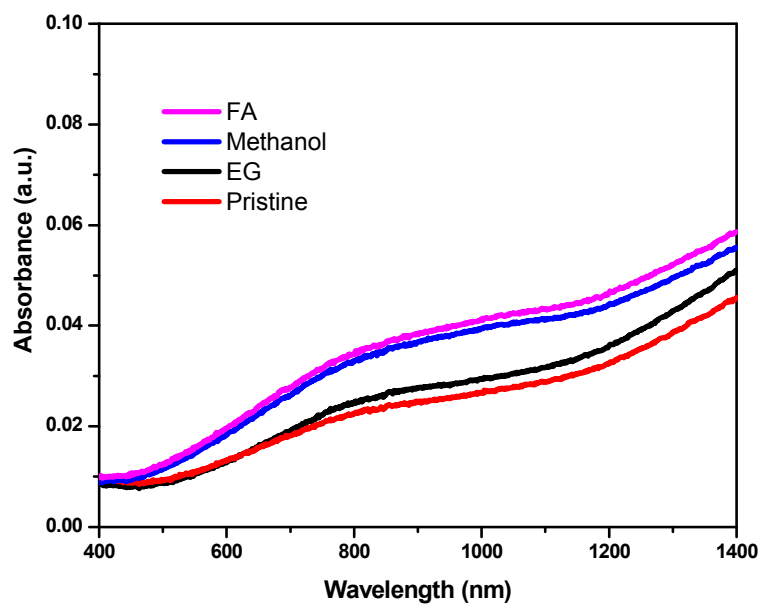

**Figure S6** Absorption spectra of PEDOT:PSS thin films for pristine and treated with EG, methanol and FA.

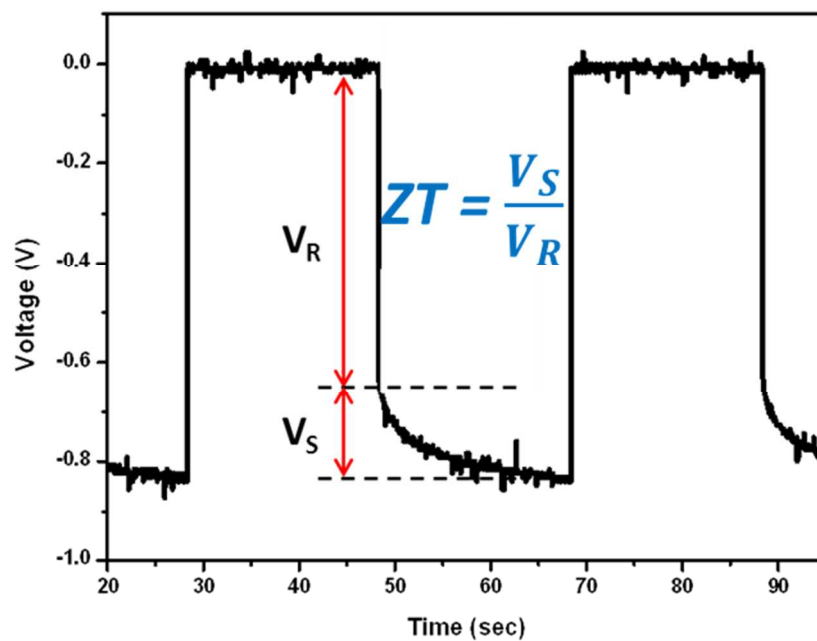

**Figure S7** Graph of V vs t by Harman method for the vertical ZT measurement for the PEDOT:PSS bulky papers.

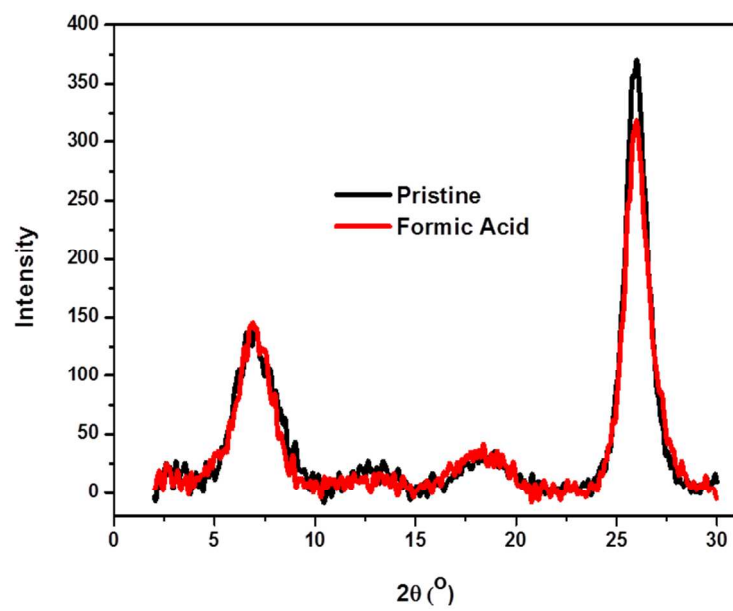

**Figure S8** XRD patterns of PEDOT:PSS bulky papers: pristine and after treatment with formic acid.
